# Supplementary material for: Cj0683 Is a Competence Protein Essential for Efficient Initialization of DNA Uptake in Campylobacter jejuni
Source: MDPI journal article supplement (doi:10.3390/biom13030514), 2023-03-11
Supplement: s1 [file s1]

## Supplementary Material

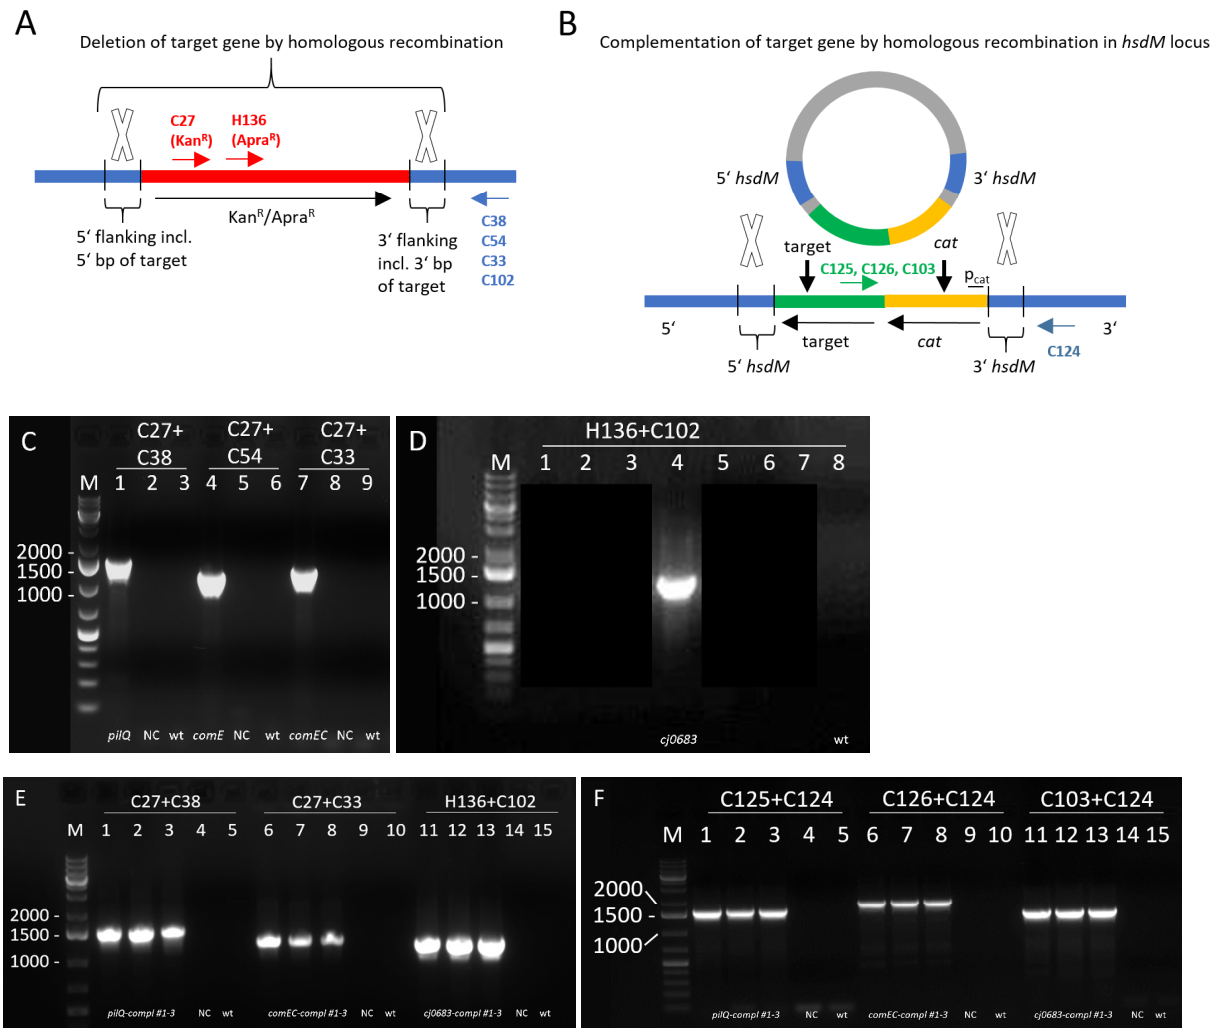

**Figure S1.** PCR results of successful allelic exchange of mutant strains used in the study. **A**, Cloning strategy for construction of deletion mutants and **B**, their complemented strains. Kan<sup>R</sup>, kanamycin resistance cassette; Apra<sup>R</sup>, apramycin resistance cassette; cat, chloramphenicol resistance cassette including the promoter (p<sub>cat</sub>). Flanking regions include 6 to 123 bp of the respective target gene. PCR fragments were separated on a 1 % agarose gel (**C-E**). Lanes are numbered above and annotated below with the respective mutant name, wt (wild type), NC (negative control) or M (1 kb DNA ladder). Other non-relevant lanes are covered by black boxes. **C**, PCR results for verification of successful deletion of *pilQ* (C27+C38), *comE* (C27+C54), and *comEC* (C27+C33). **D**, PCR results for verification of successful deletion of *cj0683* (H136+C102). **E**, PCR results for verification of successful deletion of the target gene at its native location in the complemented strains *pilQ-compl* (C27+C38), *comEC-compl* (C27+C33), and *cj0683-compl* (H136+C102); three clones each are depicted (#). **F**, PCR results for verification of successful integration of the target genes in the complemented strains *pilQ-compl* (C125+C124), *comEC-compl* (C126+C124), and *cj0683-compl* (C103+C124) in *hsdM*; three clones each are depicted (#).

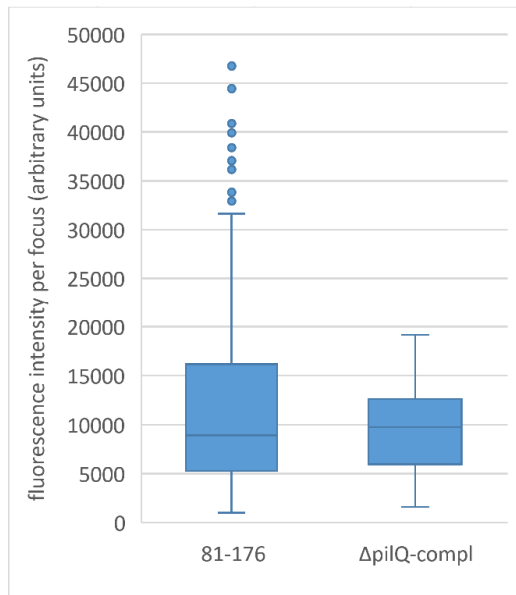

**Figure S2.** Median DNA amounts imported by  $\Delta pilQ$ -compl (n=27) were comparable to the wild type (n=568). The boxplot length corresponds to the interquartile range (IQR; 50 %) of data, the horizontal bar indicates the median value; whiskers represent  $1.5 \times$  IQR or the maximum/minimum value of the dataset; dots, outliers.

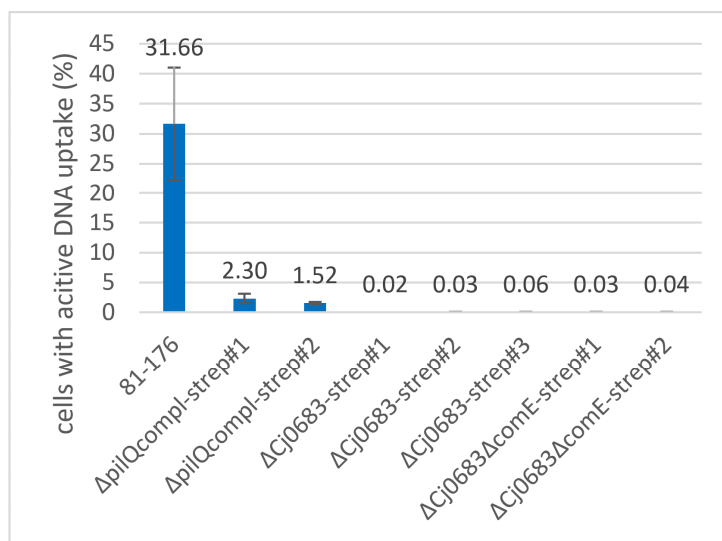

**Figure S3.** Successfully transformed mutant strains  $\Delta pilQ$ -compl,  $\Delta Cj0683$ , and  $\Delta Cj0683\Delta comE$  (name extension “-strep”) displayed similar fractions of competent cells as their respective parental strains. Fraction of cells with functional DNA uptake after incubation with Cy3-labelled *C. jejuni* DNA is depicted. #, clone number. Results of three independent experiments are shown.

**Table S1.** Strains used in this study.

| Strain                               | Reference       | Species | Description                                                                                           |
|--------------------------------------|-----------------|---------|-------------------------------------------------------------------------------------------------------|
| 81-176                               | [31]            | Cj      | wild type strain                                                                                      |
| NCTC 11168                           | [35]            | Cj      | wild type strain                                                                                      |
| 81-176 $\Delta$ <i>pilQ</i>          | This study      | Cj      | Mutant strain lacking of the outer membrane pore PilQ (=CtsD=Cj1474c), <i>pilQ</i> ::Kan <sup>R</sup> |
| 81-176 $\Delta$ <i>comE</i>          | This study      | Cj      | Mutant strain lacking ComE (=Cj0011c), <i>comE</i> ::Kan <sup>R</sup>                                 |
| 81-176 $\Delta$ <i>comEC</i>         | This study      | Cj      | Mutant strain lacking the inner membrane channel ComEC (=Cj1211), <i>comEC</i> ::Kan <sup>R</sup>     |
| 81-176 $\Delta$ <i>cj0683</i>        | This study      | Cj      | Mutant strain lacking the periplasmic protein Cj0683, $\Delta$ <i>cj0683</i> ::Apra <sup>R</sup>      |
| 81-176 $\Delta$ <i>pilQ</i> -compl   | This study      | Cj      | Complemented strain of <i>pilQ</i>                                                                    |
| 81-176 $\Delta$ <i>comEC</i> -compl  | This study      | Cj      | Complemented strain of <i>comEC</i>                                                                   |
| 81-176 $\Delta$ <i>cj0683</i> -compl | This study      | Cj      | Complemented strain of <i>cj0683</i>                                                                  |
| DH5 $\alpha$ -pSB3021                | [37]/this study | Ec      | Suicide vector for integration of target gene in <i>hsdM</i> for complementation                      |
| J99                                  | [32]            | Hp      | wild type strain                                                                                      |

Cj *Campylobacter jejuni*; Ec *Escherichia coli*; Hp *Helicobacter pylori*

**Table S2.** Oligonucleotides used in this study.

| Name | Sequence (5'-3')                                                             |
|------|------------------------------------------------------------------------------|
| C27  | GGACATGATGCTATGGCTG                                                          |
| C29  | TTGGATCCGGTTGGAATTTAGCTGCAG                                                  |
| C30  | CACCCGGGTACCGAGGAGAAAAATAAATAATGAAATCTTTAAAG                                 |
| C31  | TTTGTACCTGGAGGGAATAATGGAATAATATCCATATCCATTTTG                                |
| C32  | TTTGTGACCCAAACAACTTTAGATGATTATAAAATAG                                        |
| C33  | GCAACAAGATGTTGTTGCTAC                                                        |
| C34  | TTGGATCCGCAATAAAAAAGACGCTCAAC                                                |
| C35  | CACCCGGGTACCGAGCGTTAATACTGATATCAAAAAGACG                                     |
| C36  | TTTGTACCTGGAGGGAATAATGGATAGCGTAAATGCTCCAAGTC                                 |
| C37  | TTTGTGACCTTAAATTCCTTGAGAAATTTTGTG                                            |
| C38  | GCACCGCTTAACTTCTCTAG                                                         |
| C44  | TTGGATCCCATGCAAGAGCAGAATTTAAAG                                               |
| C45  | CACCCGGGTACCGAGAAAATAGTAATTTTTTCATTTCTTATCC                                  |
| C46  | TTTGTACCTGGAGGGAATAATGGATATCACAATAGAATAAAAGGGC                               |
| C47  | TTTGTGACTTTTGTGCCATAGGCTTTG                                                  |
| C54  | TTGAATTCCTTTGTGCCATAGGCTTTG                                                  |
| C98  | GTTGCGAATTCATGGCTTCTGTTGATCAGG                                               |
| C99  | CGTATTGCATGACATTGCACTCCACCGCTTCAGTTTCATTTGTCTGGGAGTTC                        |
| C100 | CGGAGAACGAGATGCAAGATCTGATATAAGATATTATGAACCTG                                 |
| C101 | GGTCTGAATTCTAAAGCTTGCTTACCCTGTTC                                             |
| C102 | TAAAGATGGGGTTGCAGAAC                                                         |
| C103 | AGATAATGCGCAAAACAATC                                                         |
| C113 | GTACAGCCATGGGAATTCAAAGAGCATAAAGGCTTAAATGATAAGATTAATATTAATTAATTAACATTCTTTTTTG |
| C114 | ATGATCCTCGAGGAATTCCTTACTCATAATGCTTAAATCCTAGATCTTTAAG                         |
| C115 | GTACAGCCATGGGAATTCAAAGAGCATAAAGGCTTAAATGTCTCTATGGAATTCCTTTTCTTACTC           |
| C116 | ATGATCCTCGAGGAATTCCTAAATCACAATCATAATGAAGGG                                   |
| C117 | GTACAGCCATGGGAATTCAAAGAGCATAAAGGCTTAAATGAACAAAGCTTTTACTCTGCTTG               |
| C118 | ATGATCCTCGAGGAATTCCTATATCAGATCTTTCATCTAGAACTTCC                              |
| C124 | ATTGACGCTTTTGGAGAATG                                                         |
| C125 | TAGGCATTTTACTCAATATCTTGCC                                                    |
| C126 | GCAATTAGCGGTTATCACATAG                                                       |
| H11  | GCAGCTCCATCAGCAAAAGGG                                                        |
| H12  | TCCAACGTCATCTCGTTCTCCG                                                       |
| H13  | GCTCGGTACCCGGGTGACTAAC                                                       |
| H14  | TCCCCGGGTCATTATCCCTC                                                         |
| H136 | GAGCAGATCATCTCTGATCC                                                         |
